# Supplementary material
Source: publisher site journal article supplement (https://www.dovepress.com/get_supplementary_file.php?f=321202.docx)
Supplement: Supplementary file 1 [file get_supplementary_file.php]

**Supplementary tables:**

Table-S1: Comparisons between cytopenias occurring before and after CAR-T

|  | Median duration (range) | p-value |
| --- | --- | --- |
| Leukopenia prior to CART (n=16) | 70 (9-303) | 0.49 |
| Leukopenia after CART (n=16) | 24 (1-296) |  |
| Neutropenia prior to CART (n=4) | 12 (5-36) | 0.53 |
| Neutropenia after CART (n=27) | 9 (2-205) |  |
| Lymphopenia prior to CART (n=26) | 126 (8-305) | 0.15 |
| Lymphopenia after CART (n=6) | 68 (7-214) |  |
| Thrombocytopenia prior to CART (n=16) | 123 (0-288) | 0.07 |
| Thrombocytopenia after CART (n=14) | 11 (1-303) |  |
| Anemia prior to CART (n=23) | 126 (16-303) | 0.23 |
| Anemia after CART (n=8) | 41 (9-245) |  |

Table-S2: Correlations between cytopenias and cytokine release syndrome (CRS) and neutrotoxicity

| Cytopenia Duration in Days, median (range) | **No CRS (n=2)** | **CRS (n=30)** | p-value |
| --- | --- | --- | --- |
| Neutropenia  missing | 13 (13-13)  1 | 9 (2-205)  0 | 0.47 |
| Lymphopenia | 119.5 (64-175) | 117.5 (7-305) | 0.85 |
| Leukopenia | 88 (1-175) | 49 (4-303) | 0.79 |
| Thrombocytopenia  missing | 165 (155-175)  0 | 79 (0-303)  2 | 0.31 |
| Anemia  missing | 175 (175-175)  1 | 122.5 (9-303)  0 | 0.54 |
| Any Cytopenia | 2.4 (2.1-2.7) | 3.4 (1-10) | 0.27 |

| Cytopenia Duration in Days, median (range) | **No Neurotoxicity (n=9)** | **Neurotoxicity (n=23)** | p-value |
| --- | --- | --- | --- |
| Neutropenia  missing | 11.5 (2-16)  1 | 9 (3-205)  0 | 0.41 |
| Lymphopenia | 154 (30-305) | 108 (7-296) | 0.16 |
| Leukopenia | 77 (1-288) | 36 (4-303) | 0.52 |
| Thrombocytopenia  missing | 126 (1-288)  2 | 71 (0-303)  0 | 0.61 |
| Anemia  missing | 139.5 (21-288)  1 | 120 (9-303)  0 | 0.82 |
| Any Cytopenia | 2.7 (1-10) | 3.3 (1.1-9.7) | 0.62 |

Table-S3: D30 and D60 landmark analysis for impact of cytopenias on progression-free survival after CAR-T

| **Count Recovery by D30**  **(Yes vs. No)** | **PFS (15 events)** | |
| --- | --- | --- |
| Hazard Ratio (95% CI) | p-value |
| Neutropenia | 0.33(0.09-1.19) | 0.09 |
| Lymphopenia | 0.51 (0.12-2.30) | 0.38 |
| Leukopenia | 2.41 (0.86-6.78) | 0.10 |
| Thrombocytopenia | 0.64 (0.20-2.03) | 0.45 |
| Anemia | 1.40 (0.44-4.39) | 0.57 |

| **Count Recovery by D60**  **(Yes vs. No)** | **PFS (12 events)** | |
| --- | --- | --- |
| Hazard Ratio (95% CI) | p-value |
| Neutropenia | 0.40 (0.09-1.83) | 0.24 |
| Lymphopenia | 0.98 (0.26-3.64) | 0.97 |
| Leukopenia | 2.35 (0.74-7.40) | 0.15 |
| Thrombocytopenia | 1.15 (0.36-3.65) | 0.81 |
| Anemia | 1.42 (0.43-4.73) | 0.57 |
